# Supplementary material for: The structural context of posttranslational modifications at a proteome-wide scale
Source: PLoS Biol. 2022 May 16;20(5):e3001636. doi: 10.1371/journal.pbio.3001636 (PMC9135334; doi:10.1371/journal.pbio.3001636)
Supplement: S3 Dataset — (XLS) [file pbio.3001636.s007.xls]

## Sheet: clustering phosphosites
protein_id	ptm	n_ptms	pvalue_1d	pvalue_3d	pvalue_1d_adj_bh	pvalue_3d_adj_bh
P08559	p_stukalov	6.0	0.0022	0.0001	0.021805555555555557	0.0044857142857142865
P15121	p_stukalov	4.0	0.6339	0.0028	0.7898595238095238	0.033097297297297296
P15531	p_stukalov	6.0	0.0011	0.0038	0.01727	0.033097297297297296
P21333	p_stukalov	26.0	0.003	0.0087	0.02242857142857143	0.04386031746031746
P23443	p_stukalov	4.0	0.0	0.0017	0.0	0.02974736842105263
Q9UF83	p_stukalov	5.0	0.0165	0.0009	0.046258928571428576	0.02355

## Sheet: legend
protein_id	UniProt protein accession
ptm	p_stukalov stands for phosphosites detected by Stukalov et al. (2021)
n_ptms	number of phosphosites detected for the protein
pvalue_1d	proximity p-value considering the linear protein sequence
pvalue_3d	proximity p-value considering the 3D protein fold
pvalue_1d_adj_bh	Multiple testing adjusted p-values of the 1D analysis (Benjamini-Hochberg)
pvalue_3d_adj_bh	Multiple testing adjusted p-values of the 3D analysis (Benjamini-Hochberg)
